# Supplementary material for: Exposure to Folate Receptor Alpha Antibodies during Gestation and Weaning Leads to Severe Behavioral Deficits in Rats: A Pilot Study
Source: PLoS One. 2016 Mar 24;11(3):e0152249. doi: 10.1371/journal.pone.0152249 (PMC4807076; doi:10.1371/journal.pone.0152249)
Supplement: S2 Dataset — (XLSX) [file pone.0152249.s002.xlsx]

## Sheet: Sheet1
Passive Avoidance
ID	type	Total distance traveled.1	Total distance traveled.2	Total distance traveled.3	Total distance traveled.4	Number of entrances.1	Number of entrances.2	Number of entrances.3	Number of entrances.4	Number of shocks.1	Number of shocks.2	Number of shocks.3	Number of shocks.4	Time to first entry.1	Time to first entry.2	Time to first entry.3	Time to first entry.4
1	SC	8.26	7	9.91	#NULL!	1	1	1	#NULL!	1	1	1	#NULL!	20.4	64.9	340.53	#NULL!
2	SC	5.2	1.33	2.98	7.11	2	0	0	2	3	0	0	2	0.53	600	600	246.5
3	SC	10.99	4.2	8.24	2.9	2	0	0	1	2	0	0	1	12.7	600	600	568.3
4	SC	8.09	3.42	4.81	4.44	2	0	1	0	12	0	1	0	1.3	600	103	600
5	SC	6.78	9.91	4.78	6.08	1	1	1	0	1	4	1	0	267.7	186.5	21.2	600
6	SC	8.26	7	9.91	#NULL!	1	1	1	#NULL!	1	1	1	#NULL!	20.4	64.9	340.5	#NULL!
7	SC	15.65	9.61	11.51	7.62	4	2	0	0	10	2	0	0	25.03	191.8	600	600
8	SC	8.48	8.95	12	10.04	3	1	1	0	5	3	1	0	20.87	412.9	220.9	600
9	GST-PRW	9.84	6.48	21.75	23.58	3	2	7	8	13	7	19	19	111.07	212.03	135	95.77
10	GST-PRW	10.99	3.37	21.38	28.37	5	0	7	13	9	0	10	24	42	600.67	271.57	68.97
11	GST-PRW	10.84	23.57	17.8	8.87	5	11	7	2	22	72	35	127	28.1	12.33	24.57	43.57
12	GST-PRW	9.52	8.71	4.68	1.13	1	2	1	0	3	2	2	0	72.2	215.2	320.23	338.93
13	GST-PRW	11.03	21.92	35.74	32.9	4	6	11	8	20	10	16	18	0.53	313.83	25.83	52.67
14	GST-PRW	19.79	18.81	12.74	6.55	4	6	3	0	15	54	3	0	11.9	61.13	25.77	555.87
	Median SC	8.26	7	9.075	4.44	2	1	1	0	2.5	1	1	0	20.4	302.35	340.515	600
	Median GST-PRW	10.915	13.76	19.59	16.225	4	4	7	5	14	8.5	13	18.5	35.05	213.615	80.415	82.37
Active Avoidance
ID	type	Total distance traveled.1	Total distance traveled.2	Total distance traveled.3	Total distance traveled.4	Number of entrances.1	Number of entrances.2	Number of entrances.3	Number of entrances.4	Number of shocks.1	Number of shocks.2	Number of shocks.3	Number of shocks.4	Time to first entry.1	Time to first entry.2	Time to first entry.3	Time to first entry.4
1	SC	37.88	31.03	30.22	29.53	16	3	0	5	19	3	0	5	18.77	31.3	600	49.9
2	SC	39.81	35.5	36.98	38.4	12	3	2	0	12	4	2	0	16.03	25.8	5.3	600
3	SC	39.19	30.67	30.41	32.74	13	6	3	2	16	7	3	4	45.2	14	69.6	25.1
4	SC	35.86	36.39	35.15	32.85	4	7	2	0	5	8	2	0	12.3	31.3	61.9	600
5	SC	36.65	34.41	36.37	37.75	19	9	6	2	27	14	9	2	14.8	0.53	21.2	439.3
6	SC	37.88	31.03	30.22	29.53	16	3	0	5	19	3	0	5	18.77	31.3	600	49.93
7	SC	39.24	35.68	31.62	32.35	16	4	6	1	20	4	9	1	4.6	69.67	29.07	345.4
8	SC	36.64	35.11	37.17	35.37	19	10	4	18	38	13	4	35	10.43	46.2	34.03	20.63
9	GST-PRW	36.63	34.08	27.98	32.33	14	16	13	4	21	20	37	5	6.2	21.93	20.2	54.53
10	GST-PRW	35.66	20.97	24.84	28.58	21	10	16	15	22	51	53	54	11.1	25.9	21.13	50.3
11	GST-PRW	37.94	60.27	55.48	47.92	25	18	14	6	90	52	28	19	27.13	25	17	6.23
12	GST-PRW	25.64	22.47	30.03	29.99	9	14	13	14	31	79	44	20	33.17	26.3	24.2	44.97
13	GST-PRW	45.45	55.69	43.24	36.33	23	26	16	17	49	69	65	65	18.4	2.3	1.83	4.37
14	GST-PRW	35.56	29.51	31.94	24.98	13	17	8	15	42	45	12	58	5.33	4.03	30.1	35.77
	Median SC	37.88	34.76	33.385	32.795	16	5	2.5	2	19	5.5	2.5	3	15.415	31.3	47.965	197.665
	Median GST-PRW	36.145	31.795	30.985	31.16	17.5	16.5	13.5	14.5	36.5	51.5	40.5	37	14.75	23.465	20.665	40.37
