# Supplementary material for: Exposure to Folate Receptor Alpha Antibodies during Gestation and Weaning Leads to Severe Behavioral Deficits in Rats: A Pilot Study
Source: PLoS One. 2016 Mar 24;11(3):e0152249. doi: 10.1371/journal.pone.0152249 (PMC4807076; doi:10.1371/journal.pone.0152249)
Supplement: S6 Dataset — (XLSX) [file pone.0152249.s006.xlsx]

## Sheet: Place Avoidance POW
Active Place Avoidance
Total Distance Traveled	SC	POW
Trial 1	40.055	44.23
Trial 2	39.63	40.845
Trial 3	35.94	35.78
Trial 4	36.875	40.09
Trial 5	39.41	36.9
Total Number of Entrances	SC	POW
Trial 1	16.5	16
Trial 2	10	12.5
Trial 3	5	8
Trial 4	5	6
Trial 5	8	5.5
Trial 6	3	2
Conflict Place Avoidance
Total Distance Traveled	SC	POW
Trial 1	48.365	52.51
Trial 2	43.48	41.84
Trial 3	41.06	45.81
Trial 4	40.065	41.26
Number of Entrances	SC	POW
Trial 1	21.5	17
Trial 2	8	8.5
Trial 3	5	6.5
Trial 4	2	4.5
